# Supplementary material
Source: PubMed Central journal article supplement (PMC8091617)
Supplement: AEM.03137-20-s0009.pdf [file AEM.03137-20-s0009.pdf]

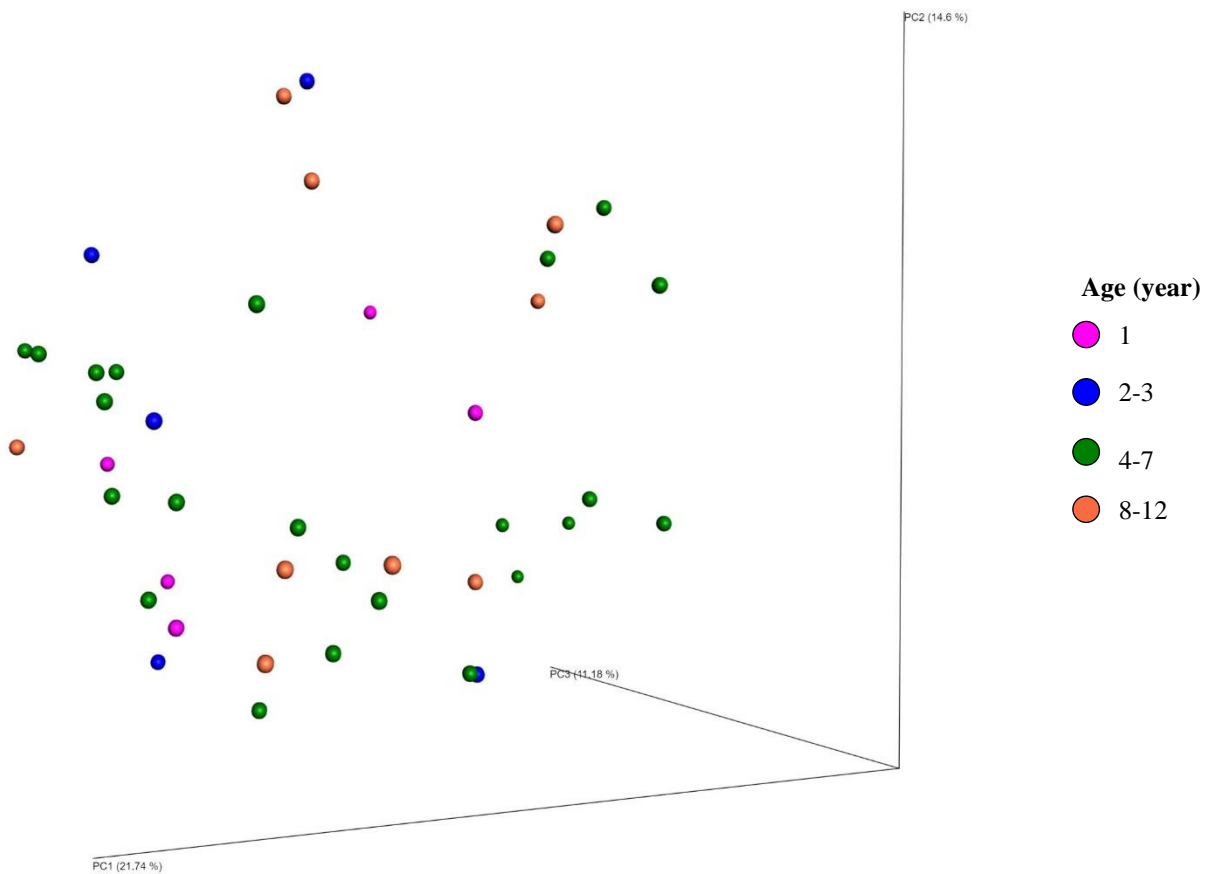

**Figure S1**

**Figure S1. Evaluation of the impact of the infant age on microbiota.** The PCoA depicts the beta diversity of samples in relation to age.

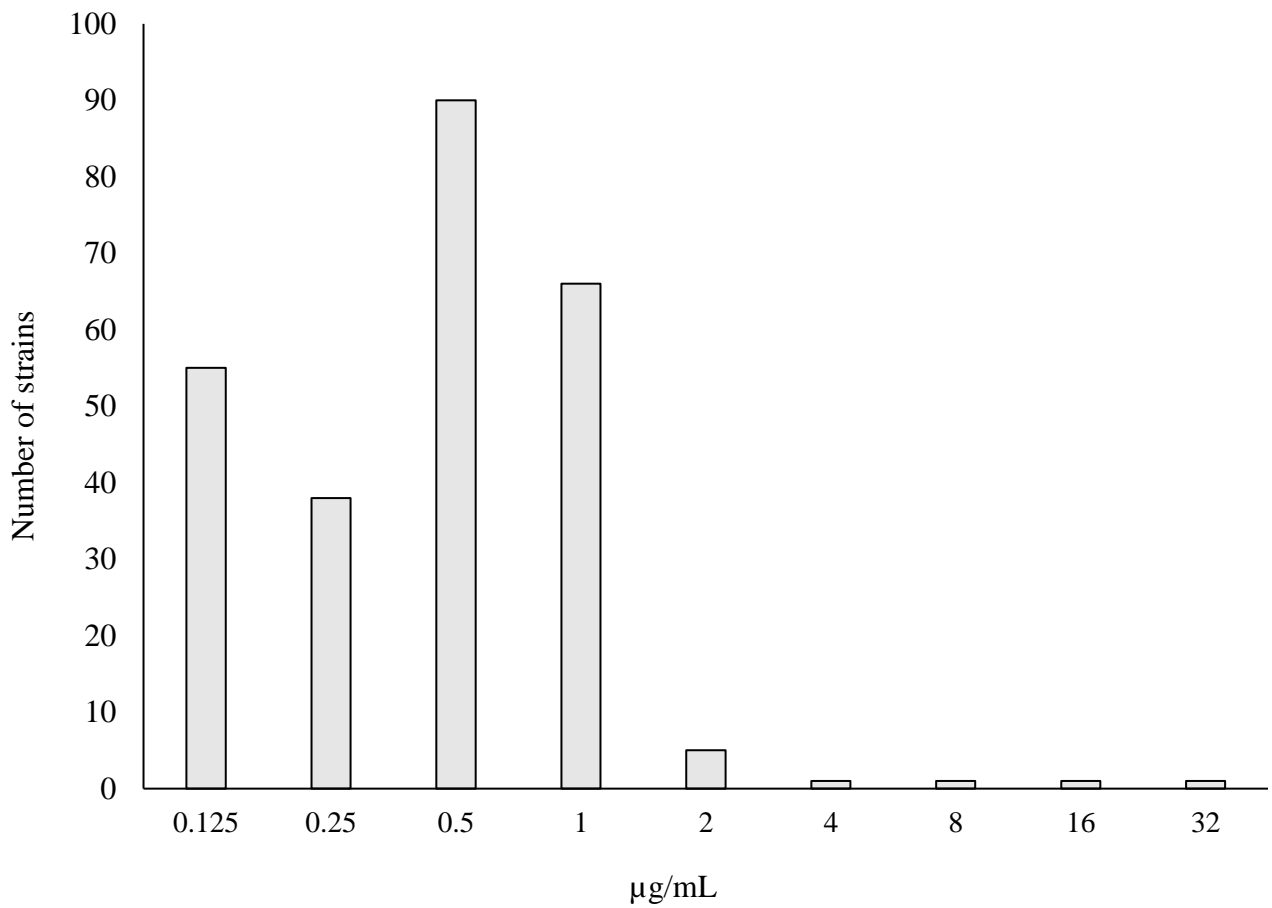

**Figure S2**

**Figure S2. AMC breakpoints values of Bifidobacterium genus.** Distribution of breakpoint values for AMC in 261 different Bifidobacterium strains tested. The x axis reports the antibiotic concentrations (microgram per milliliter), while the y axis represents the number of strains.
